# Supplementary material for: Hydrothermal synthesis, crystal structures, and luminescent properties of a series of new lanthanide oxalatophosphonates with a layer architecture
Source: Royal Society of Chemistry journal article supplement (doi:10.1039/c0dt01781g), 2011-01-01
Supplement: c0dt01781g.pdf [file c0dt01781g.pdf]

# Hydrothermal synthesis, crystal structures, and luminescent properties of a series of new lanthanide oxalatophosphonates with a layer architecture

Yan-Yu Zhu,<sup>a</sup> Zhen-Gang Sun,<sup>\*a</sup> Fei Tong,<sup>a</sup> Zhong-Min Liu,<sup>b</sup> Cui-Ying Huang,<sup>a</sup> Wei-Nan Wang,<sup>a</sup> Cheng-Qi Jiao,<sup>a</sup> Cheng-Lin Wang,<sup>a</sup> Chao Li<sup>a</sup> and Kai Chen<sup>a</sup>

## Supporting Information

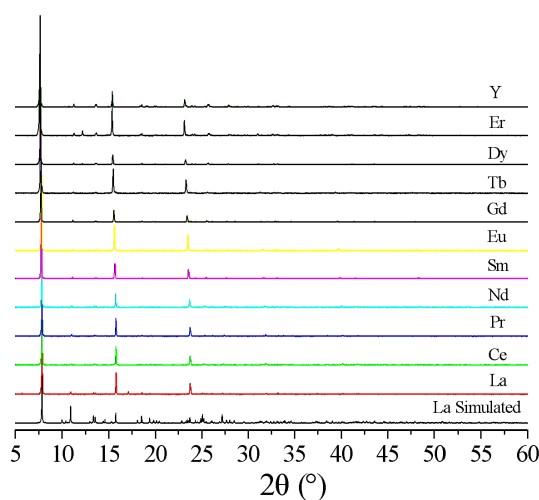

**Fig. S1** The X-ray powder diffraction patterns of the samples of **1–11** and the simulated XRD pattern of compound **1**.

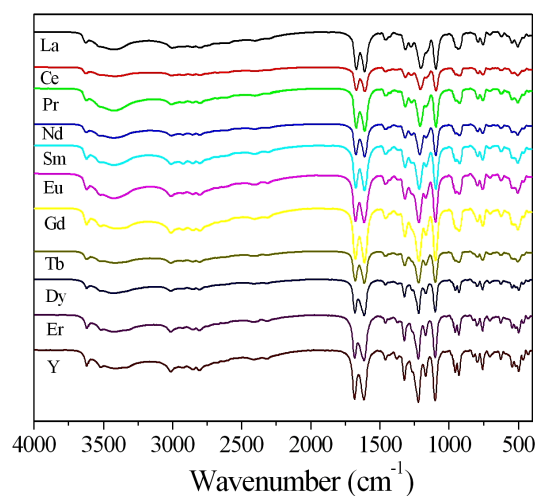

**Fig. S2** The IR spectra of compounds **1–11**.

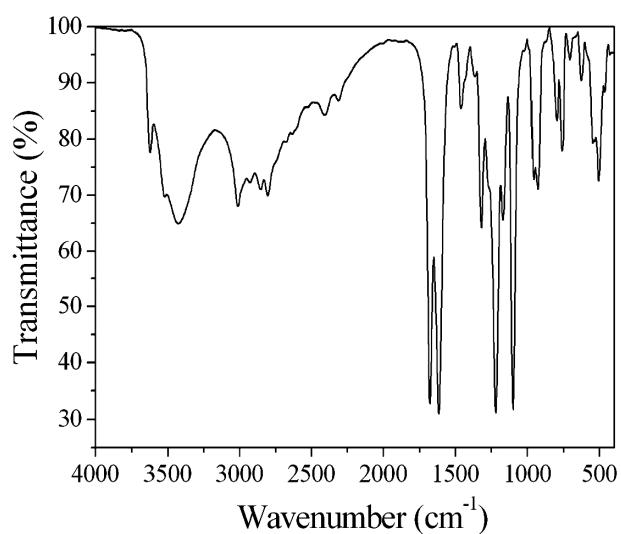

**Fig. S3** The IR spectrum of compound **6**.

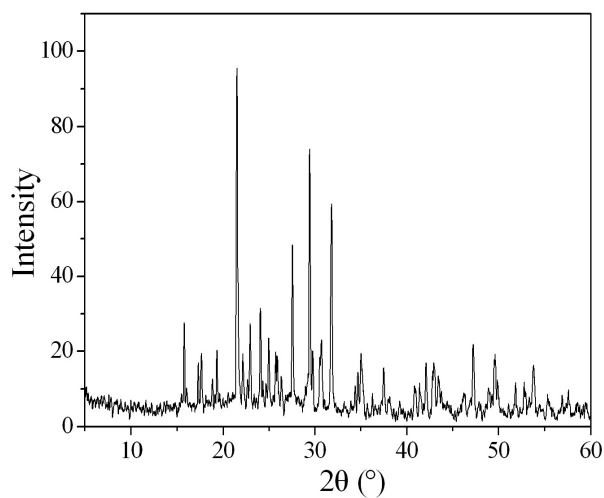

**Fig. S4** The X-ray powder diffraction pattern of the final product in the thermal decomposition for compound **6**. The final product is mixture of  $\text{Eu}(\text{PO}_3)_3$  and  $\text{EuPO}_4$  (JCPDS 00-034-1453 and 01-083-0656).

**Table S1** Selected Bond Lengths (Å) for Compounds **1–7**

|                           | <b>1 (La)</b> | <b>2 (Ce)</b> | <b>3 (Pr)</b> | <b>4 (Nd)</b> | <b>5 (Sm)</b> | <b>6 (Eu)</b> | <b>7 (Gd)</b> |
|---------------------------|---------------|---------------|---------------|---------------|---------------|---------------|---------------|
| Ln(1)–O(2)#1 <sup>a</sup> | 2.410(4)      | 2.391(2)      | 2.372(4)      | 2.361(4)      | 2.333(5)      | 2.324(3)      | 2.324(5)      |
| Ln(1)–O(1)                | 2.445(4)      | 2.416(2)      | 2.390(4)      | 2.375(4)      | 2.346(5)      | 2.336(3)      | 2.330(5)      |
| Ln(1)–O(4)                | 2.478(4)      | 2.456(2)      | 2.437(4)      | 2.423(4)      | 2.392(4)      | 2.380(3)      | 2.384(5)      |
| Ln(1)–O(8)#2              | 2.517(4)      | 2.491(2)      | 2.474(4)      | 2.466(4)      | 2.433(5)      | 2.426(3)      | 2.429(5)      |
| Ln(1)–O(7)                | 2.547(4)      | 2.527(2)      | 2.510(4)      | 2.496(4)      | 2.480(5)      | 2.463(3)      | 2.457(5)      |
| Ln(1)–O(5)#1              | 2.559(4)      | 2.538(2)      | 2.515(4)      | 2.498(4)      | 2.456(5)      | 2.451(3)      | 2.438(5)      |
| Ln(1)–O(10)#2             | 2.581(4)      | 2.557(2)      | 2.536(4)      | 2.510(4)      | 2.485(5)      | 2.469(3)      | 2.465(5)      |
| Ln(1)–O(9)                | 2.591(4)      | 2.568(2)      | 2.549(4)      | 2.523(5)      | 2.494(5)      | 2.478(3)      | 2.465(5)      |
| P(1)–O(1)                 | 1.494(4)      | 1.496(2)      | 1.498(4)      | 1.499(5)      | 1.493(5)      | 1.492(3)      | 1.496(5)      |
| P(1)–O(2)                 | 1.498(4)      | 1.498(2)      | 1.491(4)      | 1.493(4)      | 1.495(5)      | 1.498(3)      | 1.498(5)      |
| P(1)–O(3)                 | 1.556(4)      | 1.558(2)      | 1.555(4)      | 1.554(5)      | 1.550(5)      | 1.555(3)      | 1.551(6)      |
| P(1)–C(1)                 | 1.829(6)      | 1.821(3)      | 1.817(6)      | 1.810(6)      | 1.812(7)      | 1.821(5)      | 1.820(8)      |
| P(2)–O(4)                 | 1.492(4)      | 1.488(2)      | 1.482(4)      | 1.484(4)      | 1.480(5)      | 1.481(3)      | 1.474(5)      |
| P(2)–O(5)                 | 1.515(4)      | 1.512(2)      | 1.506(4)      | 1.503(5)      | 1.509(5)      | 1.511(3)      | 1.504(5)      |
| P(2)–O(6)                 | 1.563(4)      | 1.569(2)      | 1.572(4)      | 1.572(4)      | 1.568(5)      | 1.569(3)      | 1.575(5)      |
| P(2)–C(2)                 | 1.823(6)      | 1.832(4)      | 1.831(6)      | 1.829(7)      | 1.817(8)      | 1.825(5)      | 1.841(8)      |

<sup>a</sup> Symmetry transformations used to generate equivalent atoms:

#1  $-x + 1/2, -y + 3/2, -z + 1$ ; #2  $-x + 1/2, y - 1/2, -z + 3/2$

**Table S2** Selected Bond Angles (°) for Compounds 1–7

|                      | 1 (La)     | 2 (Ce)    | 3 (Pr)     | 4 (Nd)     | 5 (Sm)     | 6 (Eu)     | 7 (Gd)     |
|----------------------|------------|-----------|------------|------------|------------|------------|------------|
| O(2)#1–Ln(1)–O(1)    | 127.44(13) | 126.34(7) | 124.95(12) | 124.33(16) | 123.13(18) | 122.63(10) | 122.48(18) |
| O(2)#1–Ln(1)–O(4)    | 78.15(13)  | 78.03(8)  | 77.81(12)  | 77.58(15)  | 77.72(16)  | 77.75(11)  | 77.74(17)  |
| O(1)–Ln(1)–O(4)      | 74.53(13)  | 74.91(8)  | 75.16(12)  | 75.49(15)  | 75.87(16)  | 75.82(11)  | 75.73(17)  |
| O(2)#1–Ln(1)–O(8)#2  | 84.73(12)  | 84.50(7)  | 84.79(12)  | 84.46(15)  | 84.18(17)  | 83.75(11)  | 83.43(18)  |
| O(1)–Ln(1)–O(8)#2    | 137.03(12) | 137.46(8) | 137.74(13) | 138.02(15) | 138.17(16) | 138.29(10) | 138.59(17) |
| O(4)–Ln(1)–O(8)#2    | 146.89(13) | 146.36(8) | 146.01(13) | 145.62(16) | 145.32(18) | 145.45(11) | 145.30(18) |
| O(2)#1–Ln(1)–O(7)    | 135.15(12) | 135.72(8) | 136.39(13) | 136.89(14) | 137.60(16) | 137.84(10) | 137.78(18) |
| O(1)–Ln(1)–O(7)      | 75.34(12)  | 75.83(7)  | 76.41(12)  | 76.35(15)  | 77.26(17)  | 77.55(10)  | 77.75(17)  |
| O(4)–Ln(1)–O(7)      | 71.98(13)  | 71.86(8)  | 71.94(13)  | 71.95(15)  | 72.03(17)  | 72.11(10)  | 72.13(18)  |
| O(8)#2–Ln(1)–O(7)    | 102.70(13) | 103.28(8) | 103.41(12) | 104.21(15) | 104.53(17) | 105.16(10) | 105.36(18) |
| O(2)#1–Ln(1)–O(5)#1  | 73.50(12)  | 73.46(8)  | 73.55(13)  | 73.49(15)  | 73.10(16)  | 73.55(11)  | 73.83(18)  |
| O(1)–Ln(1)–O(5)#1    | 86.19(13)  | 84.84(8)  | 83.18(13)  | 82.45(16)  | 81.25(17)  | 80.11(11)  | 79.41(18)  |
| O(4)–Ln(1)–O(5)#1    | 124.26(12) | 124.08(7) | 123.71(12) | 123.52(16) | 123.50(17) | 123.20(10) | 122.78(18) |
| O(8)#2–Ln(1)–O(5)#1  | 76.11(13)  | 76.55(8)  | 77.41(12)  | 77.49(15)  | 77.55(17)  | 77.66(10)  | 78.15(18)  |
| O(7)–Ln(1)–O(5)#1    | 151.35(12) | 150.82(8) | 149.99(13) | 149.48(15) | 149.13(17) | 148.37(10) | 148.10(17) |
| O(2)#1–Ln(1)–O(10)#2 | 141.74(13) | 141.70(8) | 142.32(13) | 142.47(15) | 142.28(16) | 142.54(11) | 142.72(18) |
| O(1)–Ln(1)–O(10)#2   | 74.96(12)  | 75.23(7)  | 75.36(12)  | 75.17(15)  | 75.52(17)  | 75.64(10)  | 75.72(17)  |
| O(4)–Ln(1)–O(10)#2   | 139.98(13) | 140.12(8) | 139.71(13) | 139.74(15) | 139.77(16) | 139.48(11) | 139.32(17) |
| O(8)#2–Ln(1)–O(10)#2 | 63.37(12)  | 63.81(7)  | 64.29(12)  | 65.01(15)  | 65.29(17)  | 65.74(11)  | 66.14(18)  |
| O(7)–Ln(1)–O(10)#2   | 75.71(13)  | 75.66(8)  | 74.89(14)  | 74.78(15)  | 74.52(18)  | 74.10(11)  | 73.95(19)  |
| O(5)#1–Ln(1)–O(10)#2 | 78.47(13)  | 78.42(8)  | 78.83(13)  | 78.76(15)  | 78.85(17)  | 78.88(10)  | 79.05(18)  |
| O(2)#1–Ln(1)–O(9)    | 79.20(13)  | 79.38(8)  | 79.74(13)  | 79.81(15)  | 80.32(17)  | 79.93(11)  | 79.81(18)  |
| O(1)–Ln(1)–O(9)      | 136.52(12) | 137.33(8) | 138.32(13) | 138.76(15) | 139.44(16) | 140.21(11) | 140.53(18) |
| O(4)–Ln(1)–O(9)      | 79.99(13)  | 79.47(8)  | 79.33(13)  | 78.96(16)  | 78.40(17)  | 78.49(11)  | 78.73(19)  |
| O(8)#2–Ln(1)–O(9)    | 69.01(14)  | 69.12(8)  | 68.90(13)  | 69.09(16)  | 69.49(17)  | 69.63(11)  | 69.36(19)  |
| O(7)–Ln(1)–O(9)      | 63.43(12)  | 63.94(7)  | 64.52(12)  | 65.15(15)  | 65.18(17)  | 65.85(10)  | 65.97(17)  |
| O(5)#1–Ln(1)–O(9)    | 137.18(13) | 137.77(8) | 138.47(13) | 138.78(15) | 139.31(17) | 139.68(11) | 140.05(18) |
| O(10)#2–Ln(1)–O(9)   | 105.91(14) | 106.28(8) | 106.21(13) | 106.76(16) | 106.91(18) | 107.10(11) | 106.97(19) |

<sup>a</sup> Symmetry transformations used to generate equivalent atoms: #1  $-x + 1/2, -y + 3/2, -z + 1$ ; #2  $-x + 1/2, y - 1/2, -z + 3/2$
